# Supplementary material for: Multi-isotope analysis reveals that feasts in the Stonehenge environs and across Wessex drew people and animals from throughout Britain
Source: PubMed Central journal article supplement (PMC6415963; doi:10.1126/sciadv.aau6078), 2019-03-13
Supplement: aau6078_SM.pdf [file aau6078_SM.pdf]

## Supplementary Materials for

### Multi-isotope analysis reveals that feasts in the Stonehenge environs and across Wessex drew people and animals from throughout Britain

R. Madgwick\*, A. L. Lamb, H. Sloane, A. J. Nederbragt, U. Albarella, M. Parker Pearson, J. A. Evans

\*Corresponding author. Email: madgwickrd3@cardiff.ac.uk

Published 13 March 2019, *Sci. Adv.* **5**, eaau6078 (2019)

DOI: 10.1126/sciadv.aau6078

#### This PDF file includes:

Supplementary Materials and Methods

Table S1. Element, side, and context for the sampled remains.

Table S2. Enamel  $^{87}\text{Sr}/^{86}\text{Sr}$ ,  $\delta^{18}\text{O}$ , and  $\delta^{13}\text{C}$  isotope results with data on Sr concentration and carbonate replicates.

Table S3. Results from sulfur ( $\delta^{34}\text{S}$ ) isotope analysis.

Table S4. Cluster membership based on a rescaled distance of two on the example dendrogram in fig. S1.

Table S5. Characterization of the clusters in the  $K = 24$  model, showing membership ( $n$ ) at each site, isotope value ranges, and the maximum distance from the cluster center among members.

Table S6. Results of  $K = 24$  cluster analysis ordered by sample number, showing cluster membership for each sample and its distance from the cluster centre.

Table S7. Results of the  $K = 24$  cluster model, showing sample membership for each cluster.

Table S8. Samples with highly radiogenic ( $>0.7131$ )  $^{87}\text{Sr}/^{86}\text{Sr}$  values.

Fig. S1. Example dendrogram output from the hierarchical cluster analysis in SPSS with annotated cluster numbers.

## Supplementary Material

### Supplementary Materials and Methods

#### *Samples*

**Table S1. Element, side, and context for the sampled remains.** WKPE has finds numbers listed rather than contexts. Contextual information was not available for Mount Pleasant, but all material was assigned to the Late Neolithic phase. When teeth are listed in the ‘Collagen sample’ field, bulk dentine was sampled, rather than bone.

| Sample | Site             | CTX/Find no. | Collagen sample | Enamel Sample | Side |
|--------|------------------|--------------|-----------------|---------------|------|
| DW01   | Durrington Walls | 593          | Mandible        | M1            | L    |
| DW02   | Durrington Walls | 593          | Mandible        | M1            | R    |
| DW03   | Durrington Walls | 593          | Mandible        | M1            | R    |
| DW04   | Durrington Walls | 593          | Mandible        | M1            | L    |
| DW05   | Durrington Walls | 593          | Mandible        | M1            | R    |
| DW06   | Durrington Walls | 593          | Mandible        | M1            | R    |
| DW07   | Durrington Walls | 593          | Mandible        | M1            | L    |
| DW08   | Durrington Walls | 593          | Mandible        | M1            | R    |
| DW09   | Durrington Walls | 593          | Mandible        | M1            | L    |
| DW10   | Durrington Walls | 593          | Mandible        | M1            | R    |
| DW11   | Durrington Walls | 593          | Mandible        | M1            | R    |
| DW12   | Durrington Walls | 593          | Mandible        | M1            | R    |
| DW13   | Durrington Walls | 593          | Mandible        | M1            | R    |
| DW14   | Durrington Walls | 593          | Mandible        | M1            | L    |
| DW15   | Durrington Walls | 593          | Mandible        | M1            | L    |
| DW16   | Durrington Walls | 593          | Mandible        | M1            | R    |
| DW17   | Durrington Walls | 593          | Mandible        | M1            | R    |
| DW18   | Durrington Walls | 593          | Mandible        | M1            | L    |
| DW19   | Durrington Walls | 593          | Mandible        | M1            | L    |
| DW20   | Durrington Walls | 593          | Mandible        | M1            | L    |
| DW21   | Durrington Walls | 593          | Mandible        | M1            | R    |
| DW22   | Durrington Walls | 593          | Mandible        | M1            | L    |
| DW23   | Durrington Walls | 593          | Mandible        | P4            | R    |
| DW24   | Durrington Walls | 593          | Mandible        | M1            | R    |
| DW25   | Durrington Walls | 593          | Mandible        | M1            | L    |
| DW26   | Durrington Walls | 593          | Mandible        | M1            | L    |
| DW27   | Durrington Walls | 867          | Mandible        | M1            | L    |
| DW28   | Durrington Walls | 867          | Mandible        | P3            | R    |
| DW29   | Durrington Walls | 867          | Mandible        | M1            | R    |
| DW30   | Durrington Walls | 867          | Mandible        | M1            | L    |
| DW31   | Durrington Walls | 856          | Mandible        | M1            | R    |
| DW32   | Durrington Walls | 637          | Mandible        | M1            | L    |
| DW33   | Durrington Walls | 637          | Mandible        | M1            | R    |

|      |                  |      |          |    |   |
|------|------------------|------|----------|----|---|
| DW34 | Durrington Walls | 593  | Mandible | M1 | L |
| DW35 | Durrington Walls | 724  | Mandible | M1 | R |
| DW36 | Durrington Walls | 724  | Mandible | M1 | L |
| DW37 | Durrington Walls | 586  | Mandible | M1 | R |
| DW38 | Durrington Walls | 586  | Mandible | M1 | L |
| DW39 | Durrington Walls | 586  | Mandible | M1 | R |
| DW40 | Durrington Walls | 586  | Mandible | M1 | R |
| DW41 | Durrington Walls | 786  | Mandible | M1 | R |
| DW42 | Durrington Walls | 1359 | Mandible | M1 | L |
| DW43 | Durrington Walls | 1369 | Mandible | M1 | R |
| DW44 | Durrington Walls | 1359 | Mandible | M1 | R |
| DW45 | Durrington Walls | 1359 | Mandible | M1 | L |
| DW46 | Durrington Walls | 1359 | Mandible | M1 | R |
| DW47 | Durrington Walls | 1381 | Mandible | M1 | L |
| DW48 | Durrington Walls | 1381 | Mandible | M1 | R |
| DW49 | Durrington Walls | 1381 | Mandible | P4 | R |
| DW50 | Durrington Walls | 1381 | Mandible | M1 | R |
| DW51 | Durrington Walls | 1381 | Mandible | M1 | R |
| DW52 | Durrington Walls | 1381 | Mandible | M1 | L |
| DW53 | Durrington Walls | 1381 | Mandible | M1 | L |
| DW54 | Durrington Walls | 547  | Mandible | M1 | L |
| DW55 | Durrington Walls | 547  | Mandible | M1 | R |
| DW56 | Durrington Walls | 652  | Mandible | M1 | R |
| DW57 | Durrington Walls | 652  | Mandible | M1 | R |
| DW58 | Durrington Walls | 652  | Mandible | M1 | L |
| DW59 | Durrington Walls | 652  | Mandible | M1 | R |
| DW60 | Durrington Walls | 652  | Mandible | M1 | R |
| DW61 | Durrington Walls | 652  | Mandible | M1 | R |
| DW62 | Durrington Walls | 652  | Mandible | M1 | L |
| DW63 | Durrington Walls | 652  | Mandible | M1 | R |
| DW64 | Durrington Walls | 652  | Mandible | M1 | L |
| DW65 | Durrington Walls | 652  | Mandible | M1 | R |
| DW66 | Durrington Walls | 641  | Mandible | M1 | L |
| DW67 | Durrington Walls | 641  | Mandible | M1 | R |
| DW68 | Durrington Walls | 608  | Mandible | M1 | L |
| DW69 | Durrington Walls | 608  | Mandible | M1 | L |
| DW70 | Durrington Walls | 608  | Mandible | M1 | L |
| DW71 | Durrington Walls | 641  | Mandible | M1 | L |
| DW72 | Durrington Walls | 641  | Mandible | M1 | R |
| DW73 | Durrington Walls | 641  | Mandible | M1 | L |
| DW74 | Durrington Walls | 641  | Mandible | M1 | R |
| DW75 | Durrington Walls | 641  | Mandible | M1 | R |
| DW76 | Durrington Walls | 641  | Mandible | M1 | L |

|       |                  |       |                     |         |   |
|-------|------------------|-------|---------------------|---------|---|
| DW77  | Durrington Walls | 641   | Mandible            | M1      | R |
| DW78  | Durrington Walls | 1573  | Mandible            | M1      | R |
| DW79  | Durrington Walls | 1406  | Mandible            | M1      | L |
| DW80  | Durrington Walls | 1406  | Mandible            | M1      | L |
| DW81  | Durrington Walls | 1406  | Mandible            | M1      | R |
| DW82  | Durrington Walls | 1406  | Mandible            | M1      | R |
| DW83  | Durrington Walls | 1394  | Mandible            | M1      | L |
| DW84  | Durrington Walls | 1394  | Mandible            | M1      | R |
| DW85  | Durrington Walls | 593   | Mandible            | M2      | R |
| DW86  | Durrington Walls | 593   | Mandible            | M2      | R |
| DW87  | Durrington Walls | 593   | Mandible            | M2      | R |
| DW88  | Durrington Walls | 593   | Mandible            | M2      | R |
| DW89  | Durrington Walls | 593   | Mandible            | M2      | R |
| MP90  | Mount Pleasant   |       | Maxilla             | M1      | R |
| MP91  | Mount Pleasant   |       | Maxilla             | M3      | R |
| MP92  | Mount Pleasant   |       | Mandible            | P4      | R |
| MP93  | Mount Pleasant   |       | Maxilla             | M1      | R |
| MP94  | Mount Pleasant   |       | Maxilla             | M1      | R |
| MP95  | Mount Pleasant   |       | Maxilla             | M2      | R |
| MP96  | Mount Pleasant   |       | Maxilla             | M1      | L |
| MP97  | Mount Pleasant   |       | Maxilla             | P3      | R |
| MP98  | Mount Pleasant   |       | Maxilla             | M3      | R |
| MP99  | Mount Pleasant   |       | Mandible            | M2      | R |
| MP100 | Mount Pleasant   |       | Maxillary incisor   | Incisor | L |
| MP101 | Mount Pleasant   |       | Mandibular premolar | P4      | R |
| MP102 | Mount Pleasant   |       | Maxilla             | P3      | L |
| MP103 | Mount Pleasant   |       | Mandibular molar    | M1      | R |
| MP104 | Mount Pleasant   |       | Mandibular molar    | M2      | L |
| MP105 | Mount Pleasant   |       | Maxillary molar     | M2      | L |
| MP106 | Mount Pleasant   |       | Maxillary molar     | M2      | L |
| MP107 | Mount Pleasant   |       | Mandibular molar    | M1      | R |
| WK108 | WKPE             | 50836 | Mandible            | M1      | L |
| WK109 | WKPE             | 9547  | Mandible            | M1      | L |
| WK110 | WKPE             | 50417 | Mandible            | M1      | R |
| WK111 | WKPE             | 50990 | Mandible            | M1      | L |
| WK112 | WKPE             | 2321  | Mandible            | M1      | R |
| WK113 | WKPE             | 2414  | Maxilla             | M1      | R |
| WK114 | WKPE             | 2301  | Maxilla             | M1      | R |
| WK115 | WKPE             | 2222  | Maxilla             | M1      | R |
| WK116 | WKPE             | 2278  | Maxilla             | M1      | L |
| WK117 | WKPE             | 2048  | Maxilla             | M1      | R |
| WK118 | WKPE             | 2148  | Maxilla             | M1      | R |
| WK119 | WKPE             | 2353  | Maxilla             | M1      | L |

|       |        |       |                    |         |   |
|-------|--------|-------|--------------------|---------|---|
| WK120 | WKPE   | 6032  | Mandible           | M1      | R |
| WK121 | WKPE   | 50857 | Mandible           | M1      | R |
| WK122 | WKPE   | 41041 | Mandible           | M1      | L |
| WK123 | WKPE   | 1025  | Mandible           | M1      | L |
| MD124 | Marden | 16    | Mandible           | Incisor | L |
| MD125 | Marden | 16    | Mandible           | M1      | L |
| MD126 | Marden | 16    | Maxilla            | M1      | L |
| MD127 | Marden | 16    | Maxilla            | M3      | R |
| MD128 | Marden | 16    | Mandibular incisor | Incisor | L |
| MD129 | Marden | 16    | Mandible           | M1      | L |
| MD130 | Marden | 25    | Mandible           | M3      | L |
| MD131 | Marden | 25    | Mandible           | M1      | L |

### *<sup>87</sup>Sr/<sup>86</sup>Sr isotope analysis*

Dental enamel was sampled from all individuals for <sup>87</sup>Sr/<sup>86</sup>Sr isotope analysis. Only teeth that were in wear were selected to ensure that they had neared completion of the mineralisation process and were therefore resistant to diagenetic alteration. Wherever possible enamel slices were sampled from 2mm away from the enamel-root junction (ERJ) of lower first molars to provide comparable signals of early life origins (c. 2-6 months). In addition, the buccal surface of the distal cusp unit was targeted when it was sufficiently well preserved to be sampled. In some instances other M1 cusps or other teeth were analysed due to sample availability, but efforts were made to analyse areas of enamel that developed at a similar time and all specimens pertained to approximately the first eight months of life (see Table S1).

### *δ<sup>18</sup>O isotope analysis*

Every effort was made to target enamel that developed and mineralised around the same age across all samples (crown complete around 2-3 months, mineralisation estimated to be complete around 6 months). For lower M1s, which constituted the vast majority of the samples (Table S1), a strip of enamel approximately 2-3mm in breadth was sampled from 2mm from the root-enamel junction on the lingual surface of the distal cusp unit. When the lingual surface or the distal cusp unit were damaged, other portions of the tooth were sampled that would have developed at approximately the same time. Similarly, when other dental specimens were analysed sampling targeted portions of the tooth that would have developed around the same time of life. This was not possible for all samples and enamel from the M3s (N=4) and P4s (N=4) would have developed between the age of 5 and 12 months and mineralise slightly after this period.

As δ<sup>18</sup>O isotope values principally relate to climate (see Fig. 4), varied seasonal timing of the development of sampled enamel could affect the comparability of results. It was for this reason that efforts were made to sample enamel that developed at a similar age. This assumes a single birthing season in the spring, which, although not empirically demonstrated, is by far the mostly likely scenario for Late Neolithic pig husbandry (2). In any case the effects of seasonal climatic variation on values is limited in pig molars (38) and is certain to be particularly limited in first molars, which develop rapidly. The sampling of enamel that developed at a slightly later stage

should not therefore have a substantial impact on values. Variation in canines is far larger (38), but none have been analysed in this study.  $\delta^{18}\text{O}$  isotope values can also be affected by a nursing signal, prior to infants being weaned and also by dietary variation. It cannot be discounted that these variables could have impacted on isotope signals in some instances. The weaning age for pigs is variable and it has not been studied in detail for pigs in prehistoric Britain. Pigs can be weaned from an age of ten days up to four months. Organised farming of pigs has tended to encourage weaning at around 30 days of age but this can extend to 5 weeks for naturally farmed pig. Weaning ages of 4 months are rare in farming systems and even in free range strategies employed in Sardinia, 3 months have been shown to be the maximum with one month being more typical. In modern pigs the sow's milk dries off between three and eight weeks and therefore the input of a nursing signal would be strongest in the first three weeks. M1 crown development completes at 3 months and final mineralisation should be complete around 6 months. Enamel was sampled from near the REJ and therefore would have developed slightly before 3 months of age and fully mineralised later. Therefore it is possible that some nursing signal could be present in late weaned animals and values will not always represent a climatic signal relating entirely to ingested drinking water. However, this effect is likely to be rare and slight and the signal would be dampened by the completion of mineralisation after crown development. The normal distribution of the data also supports the negligible impact of a nursing signal, as this would result in some skewing (Shapiro Wilk 0.992, sig. 0.675).

#### *$\delta^{13}\text{C}$ , $\delta^{15}\text{N}$ and $\delta^{34}\text{S}$ isotope analysis*

Collagen from bone or dentine was sampled from all individuals for  $\delta^{13}\text{C}$ ,  $\delta^{15}\text{N}$  and  $\delta^{34}\text{S}$  isotope analysis. Wherever possible compact bone from the mandibular body or ramus (N=105) was analysed but in some instances it was necessary to sample maxillary bone (N=18) or dentine (N=8), see Table S1. Dentine does not remodel after production and therefore provides a signature for a specific period in the animal's development. However, relatively large sections of root extending from the apex (i.e. the latest forming part) were sampled and will therefore provide an averaged signal, rather than a short-term snapshot. Bone constantly remodels and therefore provides an averaged signature for the years before death, which is likely to cover the whole duration of the pigs' lives.

Isotope ratios of carbon, nitrogen and sulphur were measured by continuous flow-elemental analysis-isotope ratio mass spectrometry (CF-EA-IRMS). All sulphur isotope analysis was undertaken at the NERC Isotope Geosciences Laboratory facility at Keyworth in Nottinghamshire.  $\delta^{13}\text{C}$  and  $\delta^{15}\text{N}$  isotope analysis was undertaken at the School of Earth and Ocean Sciences, Cardiff University (N=78), the NERC Isotope Geosciences Laboratory facility at Keyworth (N=32) and the McDonald Institute for Archaeological Research, University of Cambridge (N=21). At Cardiff University a Flash 1112 series elemental analyser coupled to a Thermo Delta V Advantage was used in analysis. At the NERC Isotope Geosciences Laboratory facility, the instrumentation comprises an elemental analyser (Flash/EA) coupled to a ThermoFinnigan Delta Plus XL isotope ratio mass spectrometer via a ConFlo III interface. At the McDonald Institute an automated elemental analyser coupled in continuous-flow mode to an isotope-ratio monitoring mass spectrometer (Costech elemental analyser coupled to a Finnigan MAT253 mass spectrometer) was used. Results are presented in Table S3.

Analysis of all samples complied with collagen quality control criteria for sulphur (C:S ratio of 600±300; N:S ratio of 200±100, see Table S3). The mean 1σ reproducibility for mass spectrometry controls (powdered gelatine standard [M1360p] from British Drug Houses) in the 13 runs used in the δ<sup>34</sup>S dataset was ±0.20‰. A total of 123 sample replicates provided an average standard deviation of 0.36. This is acceptable, particularly considering the wide range of values produced in δ<sup>34</sup>S isotope analysis and the conservative approach to their interpretation in this study. There is very little sulphur in mammalian collagen (<0.35%) and values can range from -20‰ to +19‰ depending on diet and environment (19). Therefore greater duplicate variability must be expected than for δ<sup>13</sup>C and δ<sup>15</sup>N values. For δ<sup>13</sup>C and δ<sup>15</sup>N isotopes, replicate analysis of well-mixed samples provided average standard deviations of 0.090 for δ<sup>13</sup>C and 0.087 for δ<sup>15</sup>N. In house standards supported the reliability of analyses<sup>1</sup>. All samples had a C:N ratio of 3.2 (±0.3) and were therefore considered to be sufficiently well preserved to yield reliable δ<sup>13</sup>C and δ<sup>15</sup>N values.

## Results

*<sup>87</sup>Sr/<sup>86</sup>Sr and δ<sup>18</sup>O isotope analysis (Table S2)*

**Table S2. Enamel <sup>87</sup>Sr/<sup>86</sup>Sr, δ<sup>18</sup>O, and δ<sup>13</sup>C isotope results with data on Sr concentration and carbonate replicates.**

| Sample | Site             | Sr ppm | <sup>87</sup> Sr/ <sup>86</sup> Sr | δ <sup>18</sup> O<br>VSMOW | δ <sup>13</sup> C<br>VPDB | Replicates |
|--------|------------------|--------|------------------------------------|----------------------------|---------------------------|------------|
| DW01   | Durrington Walls | 123    | 0.708709                           | 25.0                       | -14.3                     | 2          |
| DW02   | Durrington Walls | 154    | 0.709497                           | 25.6                       | -12.8                     | 1          |
| DW03   | Durrington Walls | 127    | 0.709113                           | 25.5                       | -14.7                     | 1          |
| DW04   | Durrington Walls | 144    | 0.710039                           | 26.6                       | -14.3                     | 2          |
| DW05   | Durrington Walls | 158    | 0.711883                           | 24.0                       | -13.9                     | 1          |
| DW06   | Durrington Walls | 125    | 0.709323                           | 25.4                       | -13.2                     | 1          |
| DW07   | Durrington Walls | 75     | 0.709702                           | 27.7                       | -12.7                     | 1          |
| DW08   | Durrington Walls | 93     | 0.708646                           | 25.0                       | -14.5                     | 1          |
| DW09   | Durrington Walls | 102    | 0.708498                           | 25.8                       | -14.3                     | 1          |
| DW10   | Durrington Walls | 197    | 0.710711                           | 26.7                       | -14.3                     | 1          |
| DW11   | Durrington Walls | 130    | 0.712633                           | 25.4                       | -13.6                     | 1          |
| DW12   | Durrington Walls | 110    | 0.710325                           | 25.2                       | -14.4                     | 2          |
| DW13   | Durrington Walls | 90     | 0.709026                           | 25.9                       | -14.6                     | 1          |
| DW14   | Durrington Walls | 119    | 0.712339                           | 25.4                       | -14.3                     | 1          |
| DW15   | Durrington Walls | 217    | 0.709432                           | 26.1                       | -14.3                     | 1          |
| DW16   | Durrington Walls | 120    | 0.708323                           | 27.0                       | -13.0                     | 1          |
| DW17   | Durrington Walls | 149    | 0.710555                           | 25.0                       | -13.6                     | 1          |

<sup>1</sup>Laboratory Standards comprised supermarket gelatine and caffeine at Cardiff, a powdered gelatine standard (M1360p) from British Drug Houses and a modern cow at NIGL and caffeine, USGS40, nylon, alanine and a bovine liver standard at Cambridge.

|      |                  |     |          |      |       |   |
|------|------------------|-----|----------|------|-------|---|
| DW18 | Durrington Walls | 141 | 0.708465 | 25.4 | -13.6 | 2 |
| DW19 | Durrington Walls | 104 | 0.708767 | 27.0 | -14.7 | 1 |
| DW20 | Durrington Walls | 189 | 0.710734 | 25.2 | -14.9 | 1 |
| DW21 | Durrington Walls | 149 | 0.708498 | 25.3 | -13.8 | 1 |
| DW22 | Durrington Walls | 124 | 0.709173 | 26.2 | -14.6 | 2 |
| DW23 | Durrington Walls | 90  | 0.708261 | 26.6 | -14.9 | 1 |
| DW24 | Durrington Walls | 196 | 0.710557 | 23.6 | -13.5 | 2 |
| DW25 | Durrington Walls | 93  | 0.708330 | 27.3 | -14.6 | 1 |
| DW26 | Durrington Walls | 125 | 0.709503 | 26.2 | -14.6 | 1 |
| DW27 | Durrington Walls | 80  | 0.710133 | 25.2 | -14.1 | 1 |
| DW28 | Durrington Walls | 117 | 0.711130 | 26.3 | -14.7 | 1 |
| DW29 | Durrington Walls | 84  | 0.708566 | 27.4 | -14.3 | 2 |
| DW30 | Durrington Walls | 82  | 0.707955 | 26.0 | -14.9 | 1 |
| DW31 | Durrington Walls | 169 | 0.717206 | 25.2 | -14.7 | 1 |
| DW32 | Durrington Walls | 102 | 0.709371 | 26.6 | -15.0 | 1 |
| DW33 | Durrington Walls | 151 | 0.708554 | 26.4 | -14.2 | 1 |
| DW34 | Durrington Walls | 134 | 0.709147 | 26.0 | -14.3 | 1 |
| DW35 | Durrington Walls | 97  | 0.710316 | 25.9 | -14.4 | 1 |
| DW36 | Durrington Walls | 83  | 0.709561 | 26.2 | -14.6 | 1 |
| DW37 | Durrington Walls | 153 | 0.709754 | 26.4 | -14.3 | 1 |
| DW38 | Durrington Walls | 163 | 0.712700 | 24.4 | -14.6 | 1 |
| DW39 | Durrington Walls | 99  | 0.710221 | 24.8 | -14.1 | 2 |
| DW40 | Durrington Walls | 137 | 0.714796 | 26.5 | -14.5 | 1 |
| DW41 | Durrington Walls | 138 | 0.708640 | 26.2 | -14.9 | 1 |
| DW42 | Durrington Walls | 110 | 0.709412 | 27.7 | -14.8 | 1 |
| DW43 | Durrington Walls | 215 | 0.709390 | 26.1 | -14.4 | 1 |
| DW44 | Durrington Walls | 78  | 0.709692 | 27.0 | -13.5 | 1 |
| DW45 | Durrington Walls | 142 | 0.711295 | 27.3 | -14.0 | 1 |
| DW46 | Durrington Walls | 140 | 0.709412 | 26.3 | -14.8 | 1 |
| DW47 | Durrington Walls | 128 | 0.708387 | 25.8 | -14.6 | 1 |
| DW48 | Durrington Walls | 131 | 0.708016 | 26.8 | -14.4 | 1 |
| DW49 | Durrington Walls | 195 | 0.709548 | 25.4 | -14.6 | 1 |
| DW50 | Durrington Walls | 98  | 0.708537 | 26.9 | -12.5 | 1 |
| DW51 | Durrington Walls | 150 | 0.708521 | 26.5 | -14.8 | 1 |
| DW52 | Durrington Walls | 151 | 0.709539 | 26.8 | -14.4 | 1 |
| DW53 | Durrington Walls | 138 | 0.708464 | 26.1 | -14.9 | 1 |
| DW54 | Durrington Walls | 83  | 0.709009 | 25.7 | -14.4 | 2 |
| DW55 | Durrington Walls | 207 | 0.712693 | 23.7 | -13.9 | 2 |
| DW56 | Durrington Walls | 167 | 0.711637 | 26.7 | -14.9 | 2 |
| DW57 | Durrington Walls | 74  | 0.708465 | 25.6 | -13.9 | 1 |
| DW58 | Durrington Walls | 313 | 0.711613 | 25.3 | -12.2 | 1 |



|      |                  |     |          |      |       |   |
|------|------------------|-----|----------|------|-------|---|
| DW59 | Durrington Walls | 80  | 0.709858 | 27.5 | -14.9 | 1 |
| DW60 | Durrington Walls | 140 | 0.714861 | 25.2 | -14.8 | 1 |
| DW61 | Durrington Walls | 182 | 0.708961 | 25.6 | -14.4 | 1 |
| DW62 | Durrington Walls | 98  | 0.709722 | 25.1 | -14.7 | 1 |
| DW63 | Durrington Walls | 61  | 0.709389 | 27.5 | -14.8 | 1 |
| DW64 | Durrington Walls | 134 | 0.708384 | 25.7 | -14.7 | 1 |
| DW65 | Durrington Walls | 100 | 0.709158 | 26.2 | -15.0 | 1 |
| DW66 | Durrington Walls | 70  | 0.708240 | 26.1 | -13.6 | 1 |
| DW67 | Durrington Walls | 822 | 0.710096 | 25.0 | -13.7 | 1 |
| DW68 | Durrington Walls | 121 | 0.709223 | 24.8 | -13.2 | 1 |
| DW69 | Durrington Walls | 128 | 0.710246 | 25.8 | -14.1 | 1 |
| DW70 | Durrington Walls | 176 | 0.709379 | 23.7 | -12.5 | 1 |
| DW71 | Durrington Walls | 92  | 0.709165 | 24.7 | -13.6 | 2 |
| DW72 | Durrington Walls | 123 | 0.709420 | 25.3 | -13.0 | 2 |
| DW73 | Durrington Walls | 140 | 0.709668 | 25.3 | -13.7 | 2 |
| DW74 | Durrington Walls | 165 | 0.708935 | 24.6 | -14.0 | 2 |
| DW75 | Durrington Walls | 160 | 0.709377 | 25.6 | -13.7 | 1 |
| DW76 | Durrington Walls | 183 | 0.709563 | 26.1 | -14.0 | 1 |
| DW77 | Durrington Walls | 183 | 0.711141 | 24.3 | -11.4 | 2 |
| DW78 | Durrington Walls | 137 | 0.708961 | 26.7 | -14.9 | 1 |
| DW79 | Durrington Walls | 115 | 0.709071 | 24.8 | -13.1 | 2 |
| DW80 | Durrington Walls | 215 | 0.711479 | 25.9 | -14.6 | 1 |
| DW81 | Durrington Walls | 167 | 0.710098 | 26.5 | -14.4 | 2 |
| DW82 | Durrington Walls | 114 | 0.708760 | 26.1 | -14.6 | 2 |
| DW83 | Durrington Walls | 219 | 0.708847 | 26.9 | -14.1 | 2 |
| DW84 | Durrington Walls | 129 | 0.708118 | 26.0 | -14.5 | 2 |
| DW85 | Durrington Walls | 107 | 0.708031 | 27.2 | -14.3 | 1 |
| DW86 | Durrington Walls | 111 | 0.709349 | 26.6 | -14.3 | 1 |
| DW87 | Durrington Walls | 135 | 0.709324 | 26.6 | -15.0 | 1 |
| DW88 | Durrington Walls | 268 | 0.710338 | 25.8 | -14.1 | 1 |
| DW89 | Durrington Walls | 153 | 0.710116 | 24.4 | -12.9 | 2 |
| MP90 | Mount Pleasant   | 304 | 0.709114 | 26.5 | -13.3 | 1 |
| MP91 | Mount Pleasant   | 169 | 0.710223 | 26.3 | -13.3 | 1 |
| MP92 | Mount Pleasant   | 114 | 0.708787 | 24.1 | -14.6 | 2 |
| MP93 | Mount Pleasant   | 168 | 0.708291 | 25.7 | -14.2 | 2 |
| MP94 | Mount Pleasant   | 179 | 0.711146 | 24.1 | -14.4 | 1 |
| MP95 | Mount Pleasant   | 166 | 0.711280 | 24.7 | -14.1 | 2 |
| MP96 | Mount Pleasant   | 102 | 0.709641 | 23.2 | -12.9 | 2 |
| MP97 | Mount Pleasant   | 178 | 0.711133 | 23.9 | 13.8  | 2 |
| MP98 | Mount Pleasant   | 169 | 0.710740 | 23.7 | -15.0 | 1 |
| MP99 | Mount Pleasant   | 158 | 0.709759 | 25.2 | -13.0 | 1 |

|       |                |     |          |       |       |   |
|-------|----------------|-----|----------|-------|-------|---|
| MP100 | Mount Pleasant | 167 | 0.710668 | 24.4  | -12.7 | 2 |
| MP101 | Mount Pleasant | 205 | 0.710031 | 25.6  | -12.2 | 1 |
| MP102 | Mount Pleasant | 148 | 0.709707 | 24.5  | -13.8 | 1 |
| MP103 | Mount Pleasant | 156 | 0.710410 | 24.6  | -12.7 | 1 |
| MP104 | Mount Pleasant | 78  | 0.708420 | 23.7  | -12.9 | 1 |
| MP105 | Mount Pleasant | 84  | 0.708484 | 25.7  | -12.9 | 1 |
| MP106 | Mount Pleasant | 124 | 0.708472 | 25.6  | -13.2 | 2 |
| MP107 | Mount Pleasant | 284 | 0.709545 | 28.9  | -13.0 | 2 |
| WK108 | West Kennet PE | 85  | 0.708170 | 27.6  | -14.7 | 2 |
| WK109 | West Kennet PE | 183 | 0.711857 | 24.6  | -14.3 | 1 |
| WK110 | West Kennet PE | 105 | 0.709252 | 25.9  | -14.0 | 1 |
| WK111 | West Kennet PE | 115 | 0.709531 | 26.4  | -14.4 | 1 |
| WK112 | West Kennet PE | 103 | 0.708854 | 25.8  | -14.7 | 2 |
| WK113 | West Kennet PE | 149 | 0.711667 | 25.0  | -14.3 | 1 |
| WK114 | West Kennet PE | 168 | 0.710597 | 25.6  | -13.7 | 1 |
| WK115 | West Kennet PE | 132 | 0.709376 | 25.8  | -15.1 | 1 |
| WK116 | West Kennet PE | 123 | 0.708747 | 27.2  | -14.4 | 1 |
| WK117 | West Kennet PE | 181 | 0.708965 | 26.2  | -14.9 | 1 |
| WK118 | West Kennet PE | 115 | 0.713141 | 24.4  | -13.2 | 1 |
| WK119 | West Kennet PE | 263 | 0.711384 | 24.8  | -14.4 | 1 |
| WK120 | West Kennet PE | 115 | 0.708486 | 26.4  | -15.2 | 1 |
| WK121 | West Kennet PE | 215 | 0.713262 | 25.1  | -15.4 | 2 |
| WK122 | West Kennet PE | 227 | 0.710136 | 25.1  | -13.0 | 1 |
| WK123 | West Kennet PE | 98  | 0.708246 | 25.5  | -15.0 | 2 |
| MD124 | Marden         | 243 | 0.710377 | 23.2  | -13.6 | 2 |
| MD125 | Marden         | 133 | 0.710415 | 26.4  | -13.0 | 1 |
| MD126 | Marden         | 156 | 0.716593 | 25.9  | -13.4 | 2 |
| MD127 | Marden         | 13  | 0.709808 | 24.4  | -14.0 | 2 |
| MD128 | Marden         | 155 | 0.713471 | 25.8  | -13.8 | 2 |
| MD129 | Marden         | 177 | 0.714133 | 23.88 | -13.0 | 1 |
| MD130 | Marden         | 194 | 0.711624 | 24.0  | -12.9 | 2 |
| MD131 | Marden         | 96  | 0.708612 | 27.4  | -14.2 | 1 |

$\delta^{34}\text{S}$ ,  $\delta^{13}\text{C}$  and  $\delta^{15}\text{N}$  isotope analysis (Table S3)

**Table S3. Results from sulfur ( $\delta^{34}\text{S}$ ) isotope analysis.** The number of replicates pertains to the successful analyses that have been used in calculations. Samples with poor replicate results (N=8) have been omitted. N:S and C:S fields show atomic ratios.

| Sample | Site             | $\delta^{34}\text{S}$ | %S   | N:S | C:S | Reps | $\delta^{13}\text{C}$ | $\delta^{15}\text{N}$ | %C   | %N   | C:N | Reps |
|--------|------------------|-----------------------|------|-----|-----|------|-----------------------|-----------------------|------|------|-----|------|
| DW01   | Durrington Walls | 15.1                  | 0.15 | 180 | 548 | 2    | -21.3                 | 6.7                   | 31.6 | 12.1 | 3.1 | 3    |
| DW02   | Durrington Walls | 14.0                  | 0.15 | 174 | 573 | 2    | -20.9                 | 6.7                   | 32.5 | 11.5 | 3.3 | 3    |
| DW03   | Durrington Walls | 11.9                  | 0.14 | 172 | 572 | 2    | -20.8                 | 6.6                   | 30.5 | 10.7 | 3.3 | 3    |
| DW04   | Durrington Walls | 14.3                  | 0.13 | 184 | 594 | 2    | -20.5                 | 6.4                   | 27.9 | 10.1 | 3.2 | 3    |
| DW05   | Durrington Walls | 10.9                  | 0.22 | 131 | 416 | 2    | -20.5                 | 7.0                   | 34.1 | 12.6 | 3.2 | 2    |
| DW06   | Durrington Walls | 8.0                   | 0.15 | 160 | 494 | 2    | -20.0                 | 6.3                   | 28.1 | 10.6 | 3.1 | 3    |
| DW07   | Durrington Walls | 10.0                  | 0.14 | 202 | 662 | 2    | -20.6                 | 7.0                   | 35.9 | 12.8 | 3.3 | 3    |
| DW08   | Durrington Walls | 13.8                  | 0.19 | 136 | 454 | 2    | -19.8                 | 6.3                   | 32.3 | 11.2 | 3.4 | 3    |
| DW09   | Durrington Walls | 14.3                  | 0.17 | 148 | 468 | 2    | -20.9                 | 5.9                   | 30.4 | 11.2 | 3.2 | 3    |
| DW10   | Durrington Walls | 7.1                   | 0.17 | 168 | 570 | 2    | -20.9                 | 7.5                   | 35.8 | 12.3 | 3.4 | 2    |
| DW11   | Durrington Walls | 11.7                  | 0.13 | 181 | 605 | 2    | -20.3                 | 6.8                   | 30.5 | 10.6 | 3.4 | 2    |
| DW12   | Durrington Walls | 14.6                  | 0.16 | 182 | 585 | 2    | -20.3                 | 6.3                   | 35.8 | 13.0 | 3.2 | 3    |
| DW13   | Durrington Walls | 14.0                  | 0.12 | 177 | 528 | 2    | -20.0                 | 6.0                   | 23.5 | 9.2  | 3.0 | 3    |
| DW14   | Durrington Walls | 16.1                  | 0.14 | 176 | 517 | 2    | -20.6                 | 5.2                   | 26.6 | 10.6 | 2.9 | 3    |
| DW15   | Durrington Walls | 4.0                   | 0.15 | 160 | 509 | 2    | -21.1                 | 6.2                   | 28.6 | 10.5 | 3.2 | 3    |
| DW16   | Durrington Walls | 5.8                   | 0.16 | 187 | 625 | 2    | -20.3                 | 6.2                   | 36.6 | 12.8 | 3.3 | 2    |
| DW17   | Durrington Walls | 15                    | 0.18 | 175 | 528 | 2    | -20.3                 | 6.6                   | 36.1 | 14.0 | 3.0 | 3    |
| DW18   | Durrington Walls | 3.5                   | 0.11 | 185 | 550 | 2    | -19.9                 | 7.1                   | 22.2 | 8.7  | 3.0 | 3    |
| DW19   | Durrington Walls | 15.4                  | 0.12 | 187 | 627 | 2    | -20.0                 | 7.1                   | 29.3 | 10.2 | 3.4 | 2    |
| DW20   | Durrington Walls | 7.0                   | 0.18 | 174 | 585 | 2    | -20.9                 | 7.4                   | 40.2 | 14.0 | 3.4 | 2    |
| DW21   | Durrington Walls | 3.4                   | 0.14 | 160 | 480 | 2    | -19.9                 | 7.4                   | 25.8 | 10.1 | 3.0 | 3    |
| DW22   | Durrington Walls | 8.1                   | 0.17 | 170 | 574 | 2    | -21.9                 | 5.9                   | 36.1 | 12.5 | 3.4 | 2    |
| DW23   | Durrington Walls | 12.3                  | 0.18 | 157 | 472 | 2    | -21.0                 | 6.9                   | 31.8 | 12.4 | 3.0 | 3    |
| DW24   | Durrington Walls | 10.8                  | 0.14 | 205 | 573 | 2    | -21.3                 | 7.5                   | 31.1 | 12.5 | 2.9 | 3    |
| DW25   | Durrington Walls | 14.2                  | 0.17 | 167 | 564 | 2    | -19.7                 | 7.9                   | 36.1 | 12.5 | 3.4 | 2    |
| DW26   | Durrington Walls | 9.2                   | 0.19 | 166 | 476 | 2    | -19.8                 | 7.1                   | 34.2 | 13.9 | 2.9 | 3    |
| DW27   | Durrington Walls | 11.9                  | 0.11 | 183 | 614 | 2    | -20.1                 | 6.3                   | 26.4 | 9.2  | 3.4 | 2    |
| DW28   | Durrington Walls | 12.8                  | 0.19 | 152 | 450 | 2    | -20.9                 | 5.8                   | 31.5 | 12.4 | 3.0 | 3    |
| DW29   | Durrington Walls | 15.3                  | 0.15 | 178 | 595 | 2    | -20.3                 | 7.5                   | 32.4 | 11.3 | 3.4 | 2    |
| DW30   | Durrington Walls | 15.2                  | 0.16 | 178 | 593 | 2    | -20.2                 | 5.8                   | 36.4 | 12.7 | 3.3 | 2    |
| DW31   | Durrington Walls | 11.6                  | 0.14 | 161 | 547 | 2    | -21.0                 | 6.5                   | 28.6 | 9.8  | 3.4 | 2    |
| DW32   | Durrington Walls | 11.7                  | 0.13 | 178 | 593 | 2    | -20.6                 | 7.2                   | 28.5 | 10.0 | 3.3 | 2    |
| DW33   | Durrington Walls | 13.6                  | 0.17 | 178 | 603 | 2    | -21.1                 | 7.0                   | 38.0 | 13.1 | 3.4 | 2    |
| DW34   | Durrington Walls | 13.7                  | 0.14 | 186 | 631 | 2    | -21.7                 | 6.9                   | 32.0 | 11.0 | 3.4 | 2    |
| DW35   | Durrington Walls | 12.6                  | 0.20 | 148 | 504 | 2    | -20.5                 | 5.4                   | 37.7 | 12.9 | 3.4 | 2    |

|      |                  |      |      |     |     |   |       |     |      |      |     |   |
|------|------------------|------|------|-----|-----|---|-------|-----|------|------|-----|---|
| DW36 | Durrington Walls | 13.7 | 0.14 | 164 | 554 | 2 | -20.3 | 5.3 | 29.4 | 10.1 | 3.4 | 2 |
| DW37 | Durrington Walls | 7.7  | 0.16 | 159 | 544 | 2 | -20.9 | 7.5 | 33.5 | 11.4 | 3.4 | 2 |
| DW38 | Durrington Walls | 16.4 | 0.13 | 190 | 637 | 2 | -20.3 | 6.1 | 31.6 | 11.0 | 3.4 | 2 |
| DW39 | Durrington Walls | 13.7 | 0.14 | 172 | 582 | 2 | -20.7 | 6.1 | 31.5 | 10.8 | 3.4 | 2 |
| DW40 | Durrington Walls | 14.2 | 0.14 | 187 | 623 | 3 | -21.2 | 6.6 | 32.9 | 11.5 | 3.3 | 2 |
| DW41 | Durrington Walls | 14.1 | 0.17 | 175 | 593 | 2 | -21.4 | 6.6 | 37.9 | 13.1 | 3.4 | 2 |
| DW42 | Durrington Walls | 10.6 | 0.18 | 165 | 556 | 2 | -21.7 | 6.9 | 36.9 | 12.8 | 3.4 | 2 |
| DW43 | Durrington Walls | 2.9  | 0.12 | 213 | 711 | 2 | -21.0 | 6.5 | 31.4 | 11.0 | 3.3 | 2 |
| DW44 | Durrington Walls | 13.9 | 0.14 | 165 | 571 | 2 | -21.5 | 6.1 | 29.3 | 9.9  | 3.5 | 2 |
| DW45 | Durrington Walls | 11.7 | 0.11 | 167 | 565 | 2 | -20.9 | 6.6 | 23.2 | 8.0  | 3.4 | 2 |
| DW46 | Durrington Walls | 8.3  | 0.12 | 173 | 589 | 2 | -21.1 | 6.3 | 27.0 | 9.2  | 3.4 | 2 |
| DW47 | Durrington Walls | 5.5  | 0.13 | 168 | 579 | 2 | -20.7 | 6.5 | 28.3 | 9.6  | 3.5 | 2 |
| DW48 | Durrington Walls | 7.7  | 0.14 | 182 | 611 | 2 | -20.7 | 6.7 | 32.0 | 11.1 | 3.4 | 2 |
| DW49 | Durrington Walls | 11.9 | 0.12 | 193 | 642 | 2 | -21.7 | 6.4 | 29.0 | 10.2 | 3.3 | 3 |
| DW50 | Durrington Walls | 11.4 | 0.14 | 187 | 548 | 2 | -21.4 | 6.6 | 27.8 | 11.1 | 2.9 | 3 |
| DW51 | Durrington Walls | 8.7  | 0.14 | 134 | 458 | 2 | -20.0 | 7.0 | 24.0 | 8.2  | 3.4 | 2 |
| DW52 | Durrington Walls | 13.7 | 0.12 | 205 | 694 | 2 | -20.9 | 7.6 | 31.7 | 10.9 | 3.4 | 2 |
| DW53 | Durrington Walls | 10.5 | 0.18 | 159 | 539 | 2 | -21.4 | 7.2 | 36.3 | 12.5 | 3.4 | 2 |
| DW54 | Durrington Walls | 13.0 | 0.10 | 167 | 510 | 2 | -20.8 | 7.3 | 19.5 | 7.4  | 3.1 | 2 |
| DW55 | Durrington Walls | -    | -    | -   | -   | - | -21.1 | 6.9 | 24.4 | 9.3  | 3.1 | 2 |
| DW56 | Durrington Walls | 12.7 | 0.13 | 205 | 615 | 2 | -21.5 | 6.4 | 29.9 | 11.6 | 3.0 | 2 |
| DW57 | Durrington Walls | 14.8 | 0.08 | 195 | 594 | 2 | -20.1 | 6.0 | 16.9 | 6.5  | 3.1 | 2 |
| DW58 | Durrington Walls | 14.2 | 0.11 | 181 | 553 | 2 | -20.5 | 7.3 | 23.8 | 9.1  | 3.1 | 2 |
| DW59 | Durrington Walls | 12.7 | 0.09 | 185 | 564 | 2 | -20.6 | 8.0 | 18.1 | 6.9  | 3.1 | 2 |
| DW60 | Durrington Walls | 12.8 | 0.11 | 164 | 508 | 2 | -21.1 | 5.8 | 21.7 | 8.2  | 3.1 | 2 |
| DW61 | Durrington Walls | 14.4 | 0.13 | 162 | 509 | 2 | -20.8 | 6.0 | 24.5 | 9.1  | 3.2 | 2 |
| DW62 | Durrington Walls | 10.8 | 0.13 | 154 | 471 | 2 | -20.8 | 5.9 | 22.8 | 8.7  | 3.1 | 2 |
| DW63 | Durrington Walls | 12.2 | 0.14 | 138 | 429 | 2 | -20.6 | 6.8 | 22.2 | 8.3  | 3.1 | 2 |
| DW64 | Durrington Walls | 9.1  | 0.16 | 165 | 508 | 2 | -20.9 | 6.8 | 29.7 | 11.3 | 3.1 | 2 |
| DW65 | Durrington Walls | 7.9  | 0.13 | 179 | 546 | 2 | -21.1 | 6.7 | 26.0 | 9.9  | 3.1 | 2 |
| DW66 | Durrington Walls | -    | -    | -   | -   | - | -20.4 | 7.0 | 21.4 | 8.1  | 3.1 | 2 |
| DW67 | Durrington Walls | 12.9 | 0.09 | 135 | 420 | 2 | -21.2 | 5.6 | 13.8 | 5.2  | 3.1 | 3 |
| DW68 | Durrington Walls | 8.9  | 0.09 | 186 | 574 | 2 | -20.7 | 6.9 | 19.3 | 7.3  | 3.1 | 2 |
| DW69 | Durrington Walls | 13.7 | 0.11 | 160 | 496 | 2 | -20.2 | 5.5 | 19.8 | 7.5  | 3.1 | 3 |
| DW70 | Durrington Walls | 5.9  | 0.14 | 187 | 562 | 2 | -20.1 | 7.5 | 30.2 | 11.7 | 3.0 | 2 |
| DW71 | Durrington Walls | 6.6  | 0.16 | 166 | 502 | 2 | -20.3 | 7.7 | 29.5 | 11.4 | 3.0 | 2 |
| DW72 | Durrington Walls | 5.0  | 0.14 | 133 | 413 | 2 | -20.5 | 5.2 | 22.3 | 8.4  | 3.1 | 2 |
| DW73 | Durrington Walls | -1.6 | 0.15 | 164 | 501 | 2 | -20.3 | 5.7 | 27.9 | 10.6 | 3.1 | 2 |
| DW74 | Durrington Walls | 3.7  | 0.12 | 181 | 555 | 2 | -20.9 | 7.8 | 25.6 | 9.8  | 3.1 | 2 |
| DW75 | Durrington Walls | 16.3 | 0.09 | 151 | 467 | 2 | -21.2 | 5.8 | 15.3 | 5.8  | 3.1 | 2 |
| DW76 | Durrington Walls | -    | -    | -   | -   | - | -20.5 | 5.5 | 25.7 | 9.8  | 3.1 | 3 |

|       |                  |      |      |     |     |   |       |     |      |      |     |   |
|-------|------------------|------|------|-----|-----|---|-------|-----|------|------|-----|---|
| DW77  | Durrington Walls | 8.6  | 0.13 | 175 | 536 | 2 | -20.1 | 6.8 | 26.9 | 10.3 | 3.1 | 2 |
| DW78  | Durrington Walls | 13.4 | 0.18 | 183 | 569 | 2 | -21.2 | 6.3 | 38.9 | 14.6 | 3.1 | 2 |
| DW79  | Durrington Walls | 4.5  | 0.15 | 140 | 436 | 2 | -21.7 | 6.3 | 23.9 | 9.0  | 3.1 | 2 |
| DW80  | Durrington Walls | 13.1 | 0.11 | 209 | 646 | 2 | -20.4 | 7.2 | 26.3 | 9.9  | 3.1 | 2 |
| DW81  | Durrington Walls | 11.6 | 0.13 | 159 | 492 | 2 | -19.9 | 6.4 | 24.8 | 9.3  | 3.1 | 3 |
| DW82  | Durrington Walls | 10.2 | 0.13 | 174 | 540 | 2 | -21.6 | 6.1 | 25.6 | 9.6  | 3.1 | 2 |
| DW83  | Durrington Walls | 6.5  | 0.14 | 166 | 524 | 2 | -21   | 6.6 | 27.0 | 10.0 | 3.2 | 2 |
| DW84  | Durrington Walls | 15.8 | 0.14 | 184 | 561 | 2 | -21.1 | 6.4 | 29.2 | 11.2 | 3.1 | 2 |
| DW85  | Durrington Walls | 19.6 | 0.07 | 189 | 576 | 2 | -20.7 | 6.6 | 15.2 | 5.8  | 3.0 | 3 |
| DW86  | Durrington Walls | 14.5 | 0.15 | 171 | 533 | 2 | -21.1 | 6.7 | 30.7 | 11.5 | 3.1 | 2 |
| DW87  | Durrington Walls | 16.2 | 0.09 | 195 | 606 | 2 | -21.2 | 6.8 | 19.8 | 7.4  | 3.1 | 2 |
| DW88  | Durrington Walls | 12.8 | 0.17 | 172 | 527 | 2 | -20.5 | 6.9 | 32.8 | 12.5 | 3.1 | 2 |
| DW89  | Durrington Walls | 5.7  | 0.15 | 197 | 597 | 2 | -20.4 | 6.6 | 32.7 | 12.6 | 3.0 | 2 |
| MP90  | Mount Pleasant   | 15.5 | 0.13 | 194 | 601 | 2 | -21.6 | 7.5 | 29.3 | 11.0 | 3.1 | 2 |
| MP91  | Mount Pleasant   | 14.9 | 0.20 | 174 | 541 | 2 | -21.8 | 5.8 | 39.8 | 15.0 | 3.1 | 2 |
| MP92  | Mount Pleasant   | 14.1 | 0.19 | 179 | 550 | 2 | -20.9 | 6.8 | 39.3 | 14.9 | 3.1 | 2 |
| MP93  | Mount Pleasant   | 15.7 | 0.21 | 158 | 494 | 2 | -21.3 | 6.9 | 38.9 | 14.5 | 3.1 | 2 |
| MP94  | Mount Pleasant   | 15.9 | 0.16 | 201 | 564 | 2 | -21.5 | 6.0 | 33.4 | 11.8 | 3.3 | 2 |
| MP95  | Mount Pleasant   | 14.0 | 0.20 | 166 | 515 | 2 | -21.7 | 6.5 | 38.1 | 14.3 | 3.1 | 2 |
| MP96  | Mount Pleasant   | 2.8  | 0.16 | 185 | 586 | 2 | -21.2 | 6.8 | 35   | 12.9 | 3.2 | 2 |
| MP97  | Mount Pleasant   | 17.9 | 0.10 | 187 | 590 | 2 | -21.5 | 6.1 | 23.1 | 8.5  | 3.2 | 2 |
| MP98  | Mount Pleasant   | -    | -    | -   | -   | - | -21.9 | 6.4 | 35.9 | 13.2 | 3.2 | 2 |
| MP99  | Mount Pleasant   | 16.2 | 0.08 | 165 | 526 | 2 | -20.9 | 4.5 | 16.5 | 6.0  | 3.2 | 3 |
| MP100 | Mount Pleasant   | -    | -    | -   | -   | - | -21.5 | 7.1 | 32.0 | 11.9 | 3.1 | 2 |
| MP101 | Mount Pleasant   | 14.1 | 0.10 | 193 | 592 | 2 | -21.9 | 6.8 | 22.7 | 8.7  | 3.1 | 2 |
| MP102 | Mount Pleasant   | 5.8  | 0.11 | 186 | 572 | 2 | -21.6 | 7.1 | 22.6 | 8.6  | 3.1 | 3 |
| MP103 | Mount Pleasant   | 18.2 | 0.11 | 153 | 470 | 2 | -21.2 | 6.3 | 20.1 | 7.6  | 3.1 | 3 |
| MP104 | Mount Pleasant   | 11.8 | 0.10 | 143 | 444 | 3 | -22.4 | 6.8 | 16.3 | 6.1  | 3.1 | 2 |
| MP105 | Mount Pleasant   | 16.1 | 0.10 | 171 | 536 | 2 | -21.9 | 6.0 | 20.1 | 7.5  | 3.1 | 2 |
| MP106 | Mount Pleasant   | 18.8 | 0.09 | 167 | 529 | 2 | -23.1 | 6.2 | 17.0 | 6.3  | 3.2 | 2 |
| MP107 | Mount Pleasant   | 14.2 | 0.09 | 225 | 685 | 2 | -21.4 | 9.1 | 22.7 | 8.7  | 3   | 2 |
| WK108 | West Kennet PE   | 14.5 | 0.12 | 189 | 580 | 3 | -22.3 | 6.4 | 25   | 9.5  | 3.1 | 2 |
| WK109 | West Kennet PE   | -    | -    | -   | -   | - | -21.3 | 5.9 | 26.1 | 9.3  | 3.3 | 2 |
| WK110 | West Kennet PE   | 14.6 | 0.11 | 219 | 677 | 2 | -21.6 | 6.0 | 28.7 | 10.8 | 3.1 | 2 |
| WK111 | West Kennet PE   | 13.7 | 0.14 | 182 | 564 | 2 | -20.6 | 6.0 | 30.3 | 11.4 | 3.1 | 2 |
| WK112 | West Kennet PE   | 9.1  | 0.06 | 186 | 599 | 2 | -21.2 | 6.8 | 13.2 | 4.9  | 3.2 | 2 |
| WK113 | West Kennet PE   | 15.7 | 0.08 | 155 | 510 | 2 | -22.4 | 5.1 | 14.7 | 5.2  | 3.2 | 2 |
| WK114 | West Kennet PE   | 6.9  | 0.10 | 124 | 419 | 2 | -21.0 | 6.3 | 15.9 | 5.5  | 3.4 | 2 |
| WK115 | West Kennet PE   | 14.8 | 0.08 | 171 | 541 | 2 | -21.4 | 6.0 | 16.7 | 6.2  | 3.2 | 2 |
| WK116 | West Kennet PE   | 12.6 | 0.11 | 127 | 413 | 2 | -22.3 | 6.6 | 17.0 | 6.1  | 3.3 | 2 |
| WK117 | West Kennet PE   | 9.4  | 0.13 | 189 | 578 | 2 | -21.2 | 5.5 | 27.1 | 10.3 | 3.1 | 2 |

|       |                |      |      |     |     |   |       |     |      |     |     |   |
|-------|----------------|------|------|-----|-----|---|-------|-----|------|-----|-----|---|
| WK118 | West Kennet PE | 8.4  | 0.06 | 142 | 455 | 2 | -21.2 | 7.1 | 10.8 | 3.9 | 3.2 | 3 |
| WK119 | West Kennet PE | 17.5 | 0.11 | 173 | 542 | 1 | -21.5 | 5.6 | 22.5 | 8.4 | 3.1 | 2 |
| WK120 | West Kennet PE | 15.1 | 0.11 | 163 | 507 | 3 | -21.6 | 3.7 | 21.3 | 8.0 | 3.1 | 1 |
| WK121 | West Kennet PE | 15.6 | 0.11 | 151 | 464 | 2 | -20.8 | 5.8 | 18.5 | 7.0 | 3.1 | 2 |
| WK122 | West Kennet PE | 15.7 | 0.11 | 149 | 465 | 2 | -20.7 | 3.4 | 18.6 | 6.9 | 3.1 | 2 |
| WK123 | West Kennet PE | 16.2 | 0.08 | 189 | 584 | 2 | -21.6 | 4.9 | 18.0 | 6.8 | 3.1 | 2 |
| MD124 | Marden         | 7.0  | 0.06 | 128 | 394 | 2 | -21.6 | 5.9 | 8.6  | 3.3 | 3.1 | 2 |
| MD125 | Marden         | -    | -    | -   | -   | - | -20.3 | 5.9 | 10.7 | 4.0 | 3.1 | 2 |
| MD126 | Marden         | 11.5 | 0.08 | 208 | 635 | 2 | -21.3 | 6.2 | 19.9 | 7.6 | 3.1 | 2 |
| MD127 | Marden         | -    | -    | -   | -   | - | -21.5 | 5.1 | 11.3 | 4.3 | 3.1 | 2 |
| MD128 | Marden         | 10.7 | 0.09 | 163 | 492 | 2 | -21.9 | 6.8 | 16.9 | 6.5 | 3.0 | 2 |
| MD129 | Marden         | 6.5  | 0.06 | 196 | 597 | 2 | -21.2 | 6.5 | 13.4 | 5.1 | 3.1 | 2 |
| MD130 | Marden         | 7.4  | 0.06 | 169 | 492 | 2 | -21.1 | 6.6 | 10.6 | 4.2 | 2.9 | 2 |
| MD131 | Marden         | 13.0 | 0.07 | 131 | 406 | 2 | -22.0 | 5.0 | 10.0 | 3.8 | 3.1 | 3 |

The range of  $\delta^{18}\text{O}$  values in the dataset is the same as the full range for meteoric water from the British Isles, with the exception of an outlying sample from Mount Pleasant (MP 107, 28.9‰). This sample has  $^{87}\text{Sr}/^{86}\text{Sr}$  and  $\delta^{34}\text{S}$  isotope values characteristic of the local environs but is a clear outlier in terms of  $\delta^{15}\text{N}$  (9.1‰), which was analysed on a molar root. This high value means that the  $\delta^{18}\text{O}$  can be explained by this animal having an unusual diet and therefore it can be excluded from consideration in defining the local  $\delta^{18}\text{O}$  range. Evidence indicates that this sample was anomalous and that unusual diets or weaning effects did not have a substantial impact on the dataset as there is no correlation between the  $\delta^{18}\text{O}$  and  $\delta^{15}\text{N}$  values (Pearson 0.151, sig. 0.85) and the dataset is normally distributed (Shapiro Wilk 0.992, sig. 0.675). Skewness would be expected if diet and nursing had a substantial impact on the data. The rest of the dataset has the same range as meteoric water from the British Isles. It would be expected for drinking water values to have a slightly greater range than enamel in pigs (32) and therefore the range in the pig dataset is likely to equate to the full UK spectrum.

### Cluster Analysis

Cluster analysis was employed in order to group samples with similar isotope signals using the three provenancing indices ( $^{87}\text{Sr}/^{86}\text{Sr}$ ,  $\delta^{34}\text{S}$ ,  $\delta^{18}\text{O}$ ). This analysis has the potential to indicate the degree of diversity in origins. The first step in analysis was hierarchical clustering. Hierarchical cluster analysis builds a hierarchy of clusters, which effectively demonstrates the proximity of cases (in this instance pigs) in terms of a range of variables (in this instance provenancing isotope data). The dissimilarity of samples is assessed using the Euclidean distance interval measure. This uses the square root of the sum of the squared differences between values for the samples and is commonly used for interval data. This initial stage of analysis informed approaches taken (in terms of the number of defined clusters) in the next stage: K-means cluster analysis. K-means cluster analysis groups cases into a pre-defined number of clusters, with each case assigned to the cluster that has the closest mean values. Multiple K-means cluster models can be run and intra-cluster isotope variability must be scrutinised to assess whether the model is archaeologically

valid (i.e. whether clusters are sufficiently homogenous to represent distinct regions or whether they are too heterogeneous and must therefore comprise more than one region). If intra-cluster ranges are too diverse, a new model with a larger pre-defined numbers of clusters can be run. On the example dendrogram in fig. S1, the red arrow indicates a rescaled distance of two. Using the rescaled distance of two to generate a K value provides eight clusters in this instance. These are numbered in fig. S1 and cases are listed by cluster for clarity in Table S4. If a rescaled distance of three was chosen to generate a K value, then six clusters would be provided, as clusters 2/3 and 5/6 would be combined.

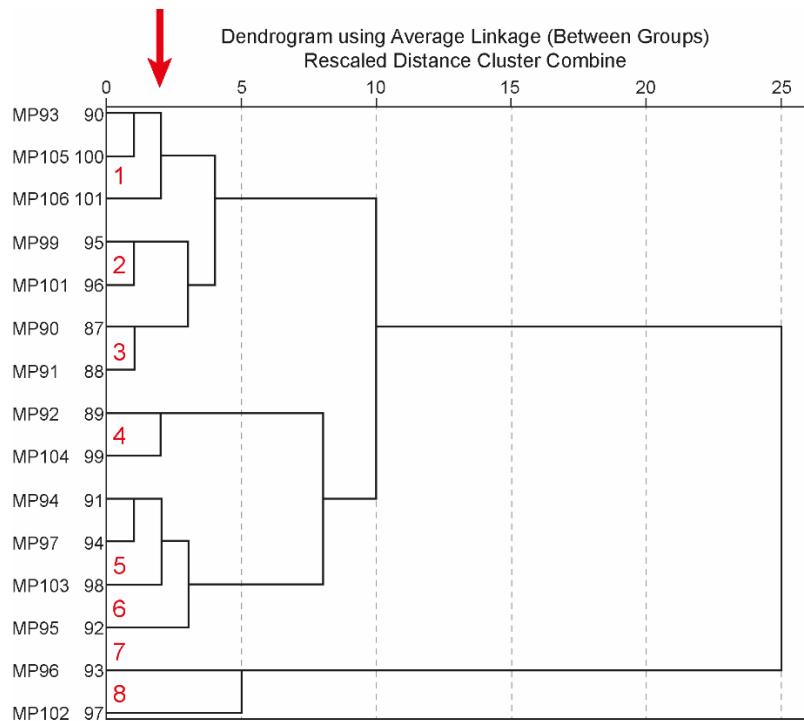

**Fig. S1. Example dendrogram output from the hierarchical cluster analysis in SPSS with annotated cluster numbers.**

**Table S4. Cluster membership based on a rescaled distance of two on the example dendrogram in fig. S1.**

| Cluster | Members            |
|---------|--------------------|
| 1       | MP93, MP105, MP106 |
| 2       | MP99, MP101        |
| 3       | MP90, MP91         |
| 4       | MP92, MP104        |
| 5       | MP94, MP97, MP103  |
| 6       | MP95               |
| 7       | MP96               |
| 8       | MP102              |

Exploratory hierarchical cluster analysis showed that a rescaled distance of two on the dendrogram provided 21 clusters and therefore K-means analysis was run using this value. Intra-cluster isotope ranges in this model were in some instances far too heterogeneous to map onto single biosphere zones and some cases were very distant from cluster centres (maximum distance of 1.329 from centroid). Using a rescaled distance of one on the dendrogram provided 38 clusters, many of which were too similar and could therefore represent the same region. This model therefore comprised too many clusters. The model was reiterated and a K value of 24 fitted the dataset best. This had a maximum case distance from the cluster centre of 0.847 and almost all clusters were both sufficiently distinct and homogenous to represent single biosphere regions based on current mapping data. In some instances,  $\delta^{34}\text{S}$  values were too wide to be likely to derive from a single region and the model therefore demonstrates a minimum of 24 distinct zones of provenance based on the three isotope proxies. The K value of 24 was deemed optimal, as increasing K yielded multiple clusters that could map on to the same biosphere region. The 24 clusters are summarised in terms of their membership, maximum distance from the cluster centre and the isotope value ranges in Table S5. Each sample's cluster membership is noted in Table S6 along with its distance from the cluster centre. The members in each cluster are listed in Table S7. In some instances the range of  $\delta^{34}\text{S}$  values are broader than might be expected from a single location.

Current methods do not have the capability to demonstrate the number of regions represented in the dataset, and in any case, how one defines a region is open to question. It is highly likely that substantially more than 24 geographical regions are represented, but that some cannot be distinguished using the three isotopic indices, in spite of being in different parts of Britain. Similarly, in some instances different clusters may be distinct in terms of the three isotope proxies, but could represent adjacent regions, perhaps even comprising parts of the same community that lived, for example, on two sides of a geological boundary.



**Table S5. Characterization of the clusters in the  $K = 24$  model, showing membership ( $n$ ) at each site, isotope value ranges, and the maximum distance from the cluster center among members.**

| Cluster | Durrington Walls (n) | Mount Pleasant (n) | WKPE (n) | Marden (n) | $^{87}\text{Sr}/^{86}\text{Sr}$ | $\delta^{34}\text{S}$ | $\delta^{18}\text{O}$ | Max distance from centroid |
|---------|----------------------|--------------------|----------|------------|---------------------------------|-----------------------|-----------------------|----------------------------|
| 1       | 3                    | 0                  | 1        | 1          | 0.7082-0.7088                   | 13.0-15.4             | 27.0-27.6             | 0.440                      |
| 2       | 2                    | 0                  | 2        | 0          | 0.7117-0.7127                   | 15.6-16.4             | 24.4-25.4             | 0.551                      |
| 3       | 1                    | 0                  | 0        | 0          | 0.7149                          | 12.8                  | 25.2                  | 0.000                      |
| 4       | 1                    | 1                  | 0        | 1          | 0.7094-0.7104                   | 2.8-7.0               | 23.2-23.7             | 0.640                      |
| 5       | 3                    | 0                  | 0        | 1          | 0.7106-0.7119                   | 7.4-10.9              | 23.6-24.3             | 0.738                      |
| 6       | 4                    | 0                  | 0        | 0          | 0.7092-0.7097                   | 6.6-10.8              | 24.7-25.4             | 0.630                      |
| 7       | 4                    | 0                  | 1        | 0          | 0.7087-0.7099                   | 10.0-12.7             | 27.2-27.7             | 0.490                      |
| 8       | 0                    | 2                  | 0        | 0          | 0.7084-0.7088                   | 11.8-14.1             | 23.6-24.1             | 0.401                      |
| 9       | 1                    | 0                  | 0        | 0          | 0.7148                          | 14.2                  | 26.5                  | 0.000                      |
| 10      | 6                    | 0                  | 0        | 0          | 0.7092-0.7107                   | 7.1-9.2               | 26.2-26.7             | 0.751                      |
| 11      | 3                    | 0                  | 0        | 1          | 0.7115-0.7135                   | 10.7-14.2             | 25.3-25.9             | 0.633                      |
| 12      | 3                    | 0                  | 0        | 0          | 0.7111-0.7116                   | 11.7-12.8             | 26.3-27.2             | 0.535                      |
| 13      | 18                   | 2                  | 2        | 0          | 0.7090-0.7103                   | 11.7-16.2             | 25.6-26.9             | 0.689                      |
| 14      | 1                    | 0                  | 0        | 0          | 0.7080                          | 19.6                  | 27.2                  | 0.000                      |
| 15      | 8                    | 0                  | 0        | 0          | 0.7085-0.7094                   | 2.9-5.5               | 24.6-26.1             | 0.768                      |
| 16      | 4                    | 0                  | 0        | 0          | 0.7080-0.7088                   | 5.8-8.7               | 26.5-27.0             | 0.453                      |
| 17      | 6                    | 3                  | 1        | 0          | 0.7098-0.7113                   | 11.9-16.2             | 24.7-25.6             | 0.763                      |
| 18      | 8                    | 3                  | 3        | 0          | 0.7080-0.7094                   | 13.8-18.8             | 25.0-26.4             | 0.847                      |
| 19      | 1                    | 0                  | 0        | 1          | 0.7166-0.7172                   | 11.5-11.6             | 25.2-25.9             | 0.316                      |
| 20      | 2                    | 1                  | 1        | 0          | 0.7097-0.7109                   | 5.7-7.0               | 24.4-25.6             | 0.669                      |
| 21      | 0                    | 0                  | 1        | 1          | 0.7131-0.7141                   | 6.5-8.4               | 23.9-24.4             | 0.445                      |
| 22      | 1                    | 0                  | 0        | 0          | 0.7097                          | -1.6                  | 25.3                  | 0.000                      |
| 23      | 6                    | 0                  | 2        | 0          | 0.7083-0.7091                   | 9.1-12.3              | 25.5-26.9             | 0.790                      |
| 24      | 0                    | 3                  | 1        | 0          | 0.7104-0.7114                   | 15.9-18.2             | 23.9-24.8             | 0.463                      |

**Table S6. Results of  $K = 24$  cluster analysis ordered by sample number, showing cluster membership for each sample and its distance from the cluster centre.**

| Sample no. | Cluster | Distance | Sample no. | Cluster | Distance | Sample no. | Cluster | Distance |
|------------|---------|----------|------------|---------|----------|------------|---------|----------|
| DW01       | 18      | 0.644    | DW42       | 7       | 0.219    | DW86       | 13      | 0.386    |
| DW02       | 13      | 0.600    | DW43       | 15      | 0.719    | DW87       | 13      | 0.706    |
| DW03       | 23      | 0.730    | DW44       | 13      | 0.665    | DW88       | 13      | 0.689    |
| DW04       | 13      | 0.431    | DW45       | 12      | 0.535    | DW89       | 20      | 0.554    |
| DW05       | 5       | 0.448    | DW46       | 10      | 0.152    | MP90       | 13      | 0.368    |
| DW06       | 6       | 0.378    | DW47       | 15      | 0.605    | MP91       | 13      | 0.521    |
| DW07       | 7       | 0.417    | DW48       | 16      | 0.288    | MP92       | 8       | 0.401    |
| DW08       | 18      | 0.796    | DW49       | 17      | 0.719    | MP93       | 18      | 0.149    |
| DW09       | 18      | 0.305    | DW50       | 23      | 0.790    | MP94       | 24      | 0.461    |
| DW10       | 10      | 0.751    | DW51       | 16      | 0.453    | MP95       | 17      | 0.763    |
| DW11       | 11      | 0.311    | DW52       | 13      | 0.540    | MP96       | 4       | 0.640    |
| DW12       | 17      | 0.188    | DW53       | 23      | 0.093    | MP97       | 24      | 0.463    |
| DW13       | 13      | 0.456    | DW54       | 13      | 0.632    | MP99       | 17      | 0.613    |
| DW14       | 2       | 0.450    | DW56       | 12      | 0.330    | MP101      | 17      | 0.460    |
| DW15       | 15      | 0.717    | DW57       | 18      | 0.180    | MP102      | 20      | 0.553    |
| DW16       | 16      | 0.381    | DW58       | 11      | 0.552    | MP103      | 24      | 0.426    |
| DW17       | 17      | 0.370    | DW59       | 7       | 0.490    | MP104      | 8       | 0.401    |
| DW18       | 15      | 0.309    | DW60       | 3       | 0.000    | MP105      | 18      | 0.170    |
| DW19       | 1       | 0.440    | DW61       | 18      | 0.397    | MP106      | 18      | 0.847    |
| DW20       | 20      | 0.462    | DW62       | 6       | 0.630    | WK108      | 1       | 0.290    |
| DW21       | 15      | 0.339    | DW63       | 7       | 0.334    | WK110      | 13      | 0.461    |
| DW22       | 10      | 0.277    | DW64       | 23      | 0.637    | WK111      | 13      | 0.337    |
| DW23       | 23      | 0.539    | DW65       | 10      | 0.291    | WK112      | 23      | 0.482    |
| DW24       | 5       | 0.738    | DW67       | 17      | 0.318    | WK113      | 2       | 0.303    |
| DW25       | 1       | 0.137    | DW68       | 6       | 0.246    | WK114      | 20      | 0.669    |
| DW26       | 10      | 0.325    | DW69       | 13      | 0.529    | WK115      | 18      | 0.369    |
| DW27       | 17      | 0.536    | DW70       | 4       | 0.473    | WK116      | 7       | 0.373    |
| DW28       | 12      | 0.497    | DW71       | 6       | 0.587    | WK117      | 23      | 0.337    |
| DW29       | 1       | 0.230    | DW72       | 15      | 0.379    | WK118      | 21      | 0.455    |
| DW30       | 18      | 0.468    | DW73       | 22      | 0.000    | WK119      | 24      | 0.452    |
| DW31       | 19      | 0.316    | DW74       | 15      | 0.768    | WK120      | 18      | 0.757    |
| DW32       | 13      | 0.584    | DW75       | 18      | 0.557    | WK121      | 2       | 0.318    |
| DW33       | 13      | 0.542    | DW77       | 5       | 0.405    | WK122      | 17      | 0.446    |
| DW34       | 13      | 0.356    | DW78       | 13      | 0.510    | WK123      | 18      | 0.291    |
| DW35       | 13      | 0.674    | DW79       | 15      | 0.589    | MD124      | 4       | 0.537    |
| DW36       | 13      | 0.081    | DW80       | 11      | 0.574    | MD126      | 19      | 0.316    |
| DW37       | 10      | 0.135    | DW81       | 13      | 0.684    | MD128      | 11      | 0.633    |
| DW38       | 2       | 0.551    | DW82       | 23      | 0.082    | MD129      | 21      | 0.455    |
| DW39       | 17      | 0.292    | DW83       | 16      | 0.317    | MD130      | 5       | 0.647    |
| DW40       | 9       | 0.000    | DW84       | 18      | 0.400    | MD131      | 1       | 0.384    |
| DW41       | 13      | 0.539    | DW85       | 14      | 0.000    |            |         |          |

**Table S7. Results of the  $K = 24$  cluster model, showing sample membership for each cluster.**

| Cluster   | Members |       |       |       |       |      |       |       |       |       |       |  |
|-----------|---------|-------|-------|-------|-------|------|-------|-------|-------|-------|-------|--|
| 1         | DW19    | DW25  | DW29  | WK118 |       |      |       |       |       |       |       |  |
| 2         | DW14    | DW38  | WK113 | WK121 |       |      |       |       |       |       |       |  |
| 3         | DW60    |       |       |       |       |      |       |       |       |       |       |  |
| 4         | DW70    | MP96  | MD124 |       |       |      |       |       |       |       |       |  |
| 5         | DW05    | DW24  | DW77  | MD130 |       |      |       |       |       |       |       |  |
| 6         | DW06    | DW62  | DW68  | DW71  |       |      |       |       |       |       |       |  |
| 7         | DW07    | DW42  | DW59  | DW63  | WK116 |      |       |       |       |       |       |  |
| 8         | MP92    | MP104 |       |       |       |      |       |       |       |       |       |  |
| 9         | DW40    |       |       |       |       |      |       |       |       |       |       |  |
| 10        | DW10    | DW22  | DW26  | DW37  | DW46  | DW65 |       |       |       |       |       |  |
| 11        | DW11    | DW58  | DW80  | MD128 |       |      |       |       |       |       |       |  |
| 12        | DW28    | DW45  | DW56  |       |       |      |       |       |       |       |       |  |
| 13        | DW02    | DW04  | DW13  | DW32  | DW33  | DW34 | DW35  | DW36  | DW41  | DW44  | DW52  |  |
| 13 (cont) | DW54    | DW69  | DW78  | DW81  | DW86  | DW87 | DW88  | MP90  | MP91  | WK110 | WK111 |  |
| 14        | DW85    |       |       |       |       |      |       |       |       |       |       |  |
| 15        | DW15    | DW18  | DW21  | DW43  | DW47  | DW72 | DW74  | DW79  |       |       |       |  |
| 16        | DW16    | DW48  | DW51  | DW83  |       |      |       |       |       |       |       |  |
| 17        | DW12    | DW17  | DW27  | DW39  | DW49  | DW67 | MP95  | MP99  | MP101 | WK122 |       |  |
| 18        | DW01    | DW08  | DW09  | DW30  | DW57  | DW61 | DW75  | DW84  | MP93  | MP105 | MP106 |  |
| 18 (cont) | WK115   | WK120 | WK123 |       |       |      |       |       |       |       |       |  |
| 19        | DW31    | MD126 |       |       |       |      |       |       |       |       |       |  |
| 20        | DW20    | DW89  | MP102 | WK114 |       |      |       |       |       |       |       |  |
| 21        | WK118   | MD129 |       |       |       |      |       |       |       |       |       |  |
| 22        | DW73    |       |       |       |       |      |       |       |       |       |       |  |
| 23        | DW03    | DW23  | DW50  | DW53  | DW64  | DW82 | WK112 | WK117 |       |       |       |  |
| 24        | MP94    | MP97  | MP103 | WK119 |       |      |       |       |       |       |       |  |

**Radiogenic values**

Table S8 presents multi-isotope data for individuals with highly radiogenic ( $>0.7131$ )  $^{87}\text{Sr}/^{86}\text{Sr}$  values.

**Table S8. Samples with highly radiogenic ( $>0.7131$ )  $^{87}\text{Sr}/^{86}\text{Sr}$  values.**

| Sample | $^{87}\text{Sr}/^{86}\text{Sr}$ | $\delta^{34}\text{S}$ (‰) | $\delta^{18}\text{O}$ (‰) |
|--------|---------------------------------|---------------------------|---------------------------|
| DW31   | 0.7172                          | 11.6                      | 25.19                     |
| MD126  | 0.7166                          | 11.5                      | 25.85                     |
| DW60   | 0.7149                          | 12.8                      | 25.20                     |
| DW40   | 0.7148                          | 14.2                      | 26.46                     |
| MD129  | 0.7141                          | 6.5                       | 23.88                     |
| MD128  | 0.7135                          | 10.7                      | 25.76                     |
| WK121  | 0.7133                          | 15.6                      | 25.06                     |
| WK118  | 0.7131                          | 8.4                       | 24.41                     |
